# Supplementary material for: Mast cell populations shift and adapt transcription profiles during the resolution of allergic airway inflammation
Source: Research Square preprint supplement (doi:10.21203/rs.3.rs-6115255/v1), 2025-03-13
Supplement: Supplementary file 1 [file 1d26efe11f9f9af7bf213194.xlsx]

## Sheet: S1 table
Day 1								Day 24
Gene	C0_D1	C1_D1	C2_D1	C3_D1	C4_D1	C5_D1		Gene	C0_D24	C1_D24	C2_D24	C3_D24	C4_D24	C5_D24
Mcpt1	250.65	1099.02	340.28	98.39	483.49	23.61		Mcpt1	6.46	53.53	426.12	405.14	139.36	0.36
Mcpt2	301.27	636.94	307.88	125.23	285.57	21.01		Mcpt2	23.03	138.79	306.77	361.9	193.92	0.53
Mcpt4	266.48	101.2	90.1	31.47	25.82	13.13		Mcpt4	32	4.32	12.54	66.89	3.94	0.46
Cma1	267.22	145.68	116.37	69.99	118.44	18.21		Cma1	174.82	39.28	121.47	156.27	65.51	4.3
Tpsb2	99.97	130.08	59.55	39.33	19.05	10.17		Tpsb2	74.76	60.56	23.55	56.55	22.21	1.81
Tpsab1	44.12	227.52	45.32	50.65	30.74	4.95		Tpsab1	22.17	102.89	49.72	82.5	56.45	0.82
Mcpt8	1.19	3.14	30.35	15.56	20.15	17.65		Mcpt8	1.7	0.35	38.16	22.61	10.14	6.65
Mcpt9	0.01	1.08	0.03	0	0.17	0		Mcpt9	0	0.11	0	0.06	0.17	0
Prss34	0.24	0.01	0.18	0	0.05	0.01		Prss34	0	0	0	0.06	0	0.16
Cpa3	101.22	83.62	99.15	77.27	63.57	16.79		Cpa3	79.82	41.21	44.12	71.45	43.72	7.09
Ctsg	2.75	0.5	4.77	3.28	3.75	0.69		Ctsg	0.52	0	3.12	5.81	1.08	0.13
Gzmb	32.42	14.5	42.7	51.22	65.25	8.01		Gzmb	17.01	1.65	40.24	62.9	21.44	6.08
Ccl2	19.04	12.73	4.58	11.36	4.22	0.24		Ccl2	12.06	17.47	4.88	5.76	0.98	0.05
Ccl3	0.63	4.26	2.22	4.74	0.59	127.74		Ccl3	1.55	9.12	4.4	3.12	3.99	122.68
Ccl4	12.46	16.68	7.91	30.69	6.31	251.43		Ccl4	33.73	44.54	17.29	16.09	23.32	214.91
Stat5b	0.33	0.26	0.23	0.5	0.53	0.68		Stat5b	0.45	0.38	0	0.42	0.62	0.7
Spi1	0.57	0.42	0.87	0.89	0.56	1.27		Spi1	1.08	0.77	1.34	0.43	0.3	2
Cdh1	0	0.04	0.27	0.07	0.05	1.6		Cdh1	0	0.05	0.59	0.27	0	2.25
Kit	14.79	10.7	10.8	10.7	14.44	0.84		Kit	12.11	8.79	7.78	5.86	16.28	0.18
Cd34	0.8	1.86	1.19	1.45	0.81	0.04		Cd34	1.28	0.79	1.83	1.19	2.07	0.02
Fcer1a	20.88	14.43	12.63	9.72	8.89	3.45		Fcer1a	13.43	8.48	10.78	11.7	7.04	2.85
Il1rl1	23.44	12.03	12.56	12.19	17.19	4.38		Il1rl1	13.99	14.18	6.69	7.9	11.81	0.71
Tph1	31.9	24.43	14.92	5.8	38	1.03		Tph1	15.09	14.19	11.88	18.24	22.09	0.27
Hdc	32.37	10.76	26.67	20.16	25.77	29.32		Hdc	40.48	15.45	23	18.03	18.91	30.99
Ndst2	1.61	1	0.8	0.77	1.01	0.22		Ndst2	1.26	0.81	1.06	0.9	0.65	0.13
Srgn	52.22	29.79	21.96	34.92	28.79	44.54		Srgn	37.46	36.46	25.52	41.14	25.13	51.84
Mrgprb2	3.18	1.26	0.81	0.96	0.06	0.07		Mrgprb2	4.71	2.88	0	0.05	0.99	0.13
Il17ra	2.79	2.07	1.14	1.11	1.6	1.77		Il17ra	3.42	1.49	0.49	0.6	0.66	2.04
Cd63	29.39	42.1	31.14	29.42	34.63	13.57		Cd63	24.88	32.6	32.61	42.51	36.42	8.12
Vegfa	3.42	5.57	2.53	1.13	3.79	0.5		Vegfa	3.96	10.39	0.41	1.31	3.3	0.69
Il6	1.02	0.74	3.59	1.34	4.72	14.78		Il6	0.62	0.91	0	1.57	1.97	11.06
Il4	1.92	1.1	1.19	1.91	1.43	10.35		Il4	2.25	1.84	1.55	1.32	0.92	2.8
Il13	1.17	5.86	2.22	3.78	3.92	4.97		Il13	1.15	7.15	2.72	4.05	1.62	1.23
Alox5	4.26	4.86	5.3	3.92	4.56	2.33		Alox5	3.5	3.47	1.55	3.59	5.4	1.25
Ptgs2	0.01	0.36	0.48	0.94	0.89	11.45		Ptgs2	0	1.01	0	0.46	0	3.17
Ltc4s	0.65	0.53	0.29	0.13	0.44	0.18		Ltc4s	0.49	0.24	0	1.07	0	0
Hpgds	2.49	1.54	1.48	2.42	1.71	0.16		Hpgds	4.28	3.86	2.27	1.16	2.26	0.03
Mki67	0.11	1.59	1.72	0.2	0.71	0.19		Mki67	0	0	1.92	1.01	0.56	0
Top2a	0.26	1.21	2.59	0.25	1.57	0.36		Top2a	0	0.45	1.14	0.78	0.9	0.2
Pcna	0.96	1.04	1.17	1.24	0.94	0.76		Pcna	2.05	1.51	0.7	1.4	1.91	1
Mitf	1.8	1.25	1.53	1.8	1.39	0.31		Mitf	3.4	1.72	0	1.29	2.21	0
Cebpa	0	0.03	0.17	0	0.05	0.91		Cebpa	0.03	0	0	0	0.2	2.83
Gata2	8.17	6.7	8.88	10.03	8.45	7.56		Gata2	9.29	7.53	4.98	5.79	7.71	8.1
Il10	0.01	0	0.07	0	0.11	0		Il10	0	0	0	0.02	0	0
Tgfb1	1.86	2.02	2.07	2.7	2.19	2.75		Tgfb1	1.4	1.67	2.16	3.08	2.22	2.86
Ahr	0.37	0.22	0.4	1.1	1.21	0		Ahr	0.6	0.34	1.09	1.27	0.38	1.34
